# Supplementary material
Source: publisher figshare collection journal article supplement (https://acs.figshare.com/ndownloader/files/7546861)
Supplement: Supplementary file 1 [file 7546861]

## Supporting Information

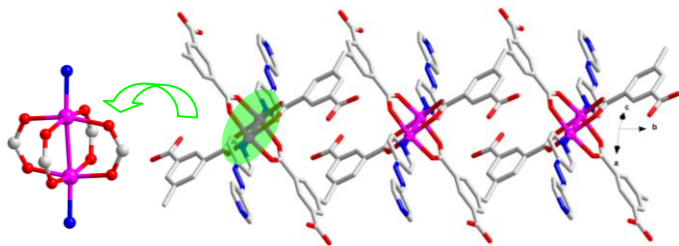

Fig. S1 Representation of 1D  $[\text{Co}_2(\text{H}_2\text{L})(\text{bpn})]_\infty$  chain with paddle-wheel dimeric cobalt unit in **2**.

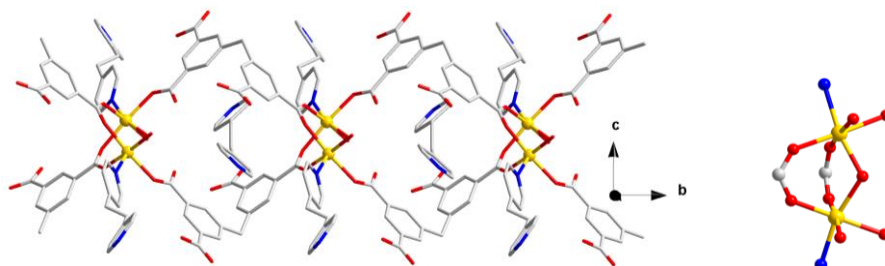

Fig. S2 Left: Representation of 1D  $[\text{Mn}_2(\text{H}_2\text{L})(\text{bpa})(\text{H}_2\text{O})_3]_\infty$  chain with free bpe in the grid of **4**;  
Right: dimeric manganese unit in **4**.

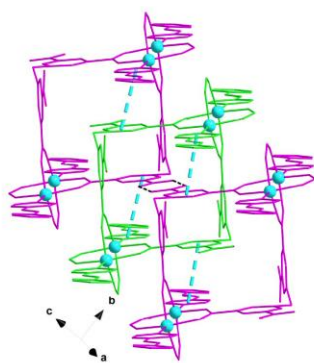

(a)

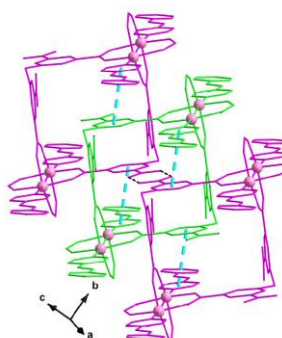

(b)

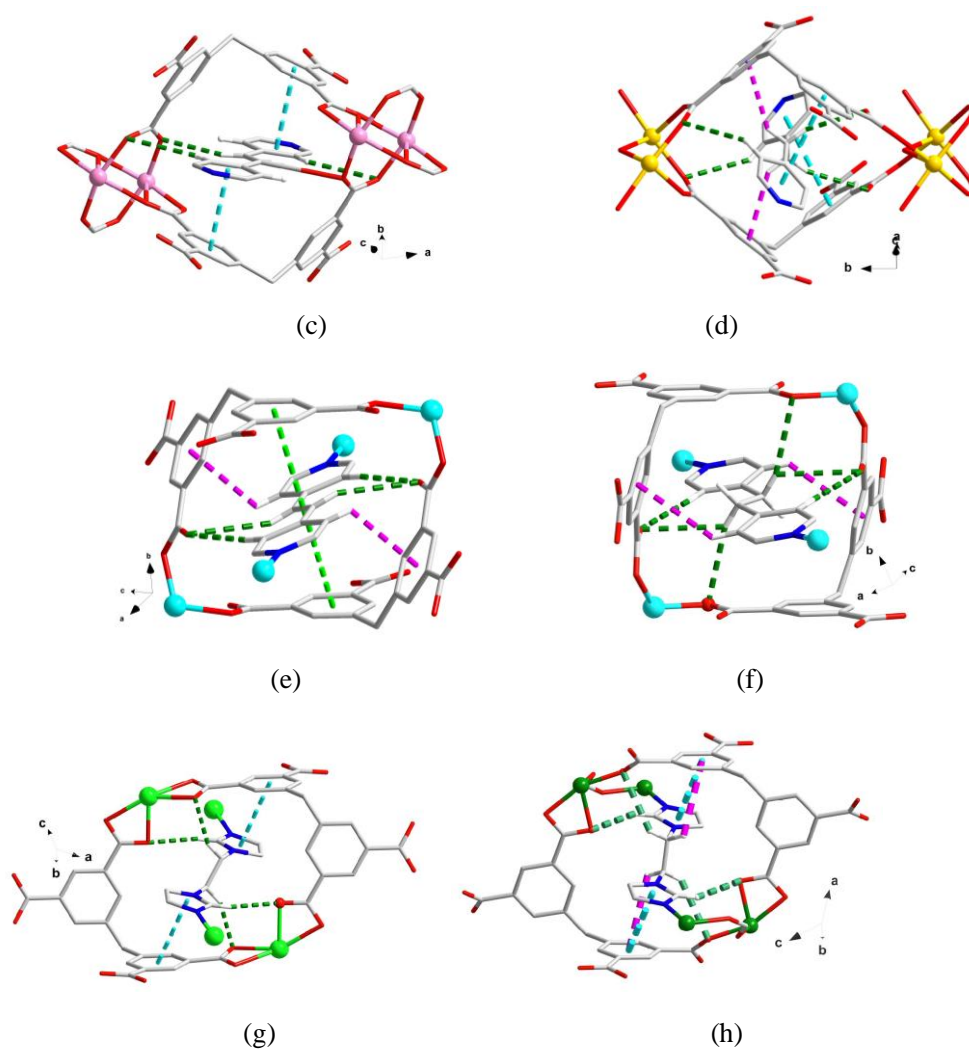

Fig. S3 Representations of weak interactions in complexes **1-8** (a-h).

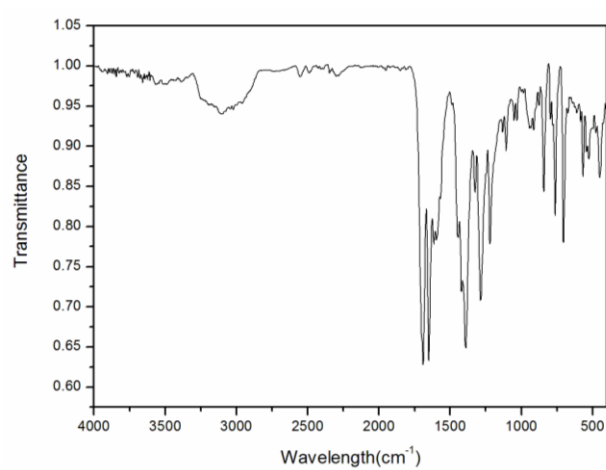

(a)

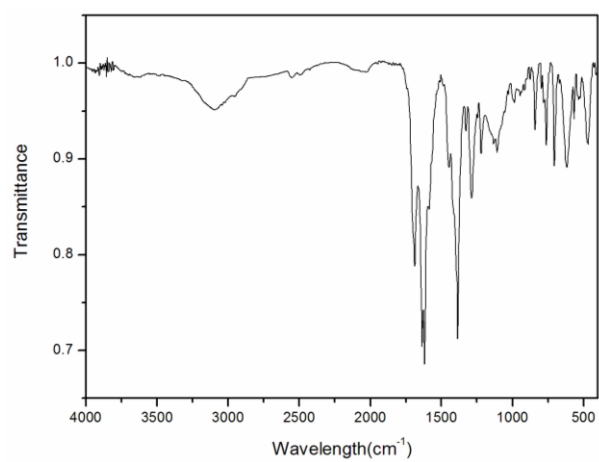

(b)

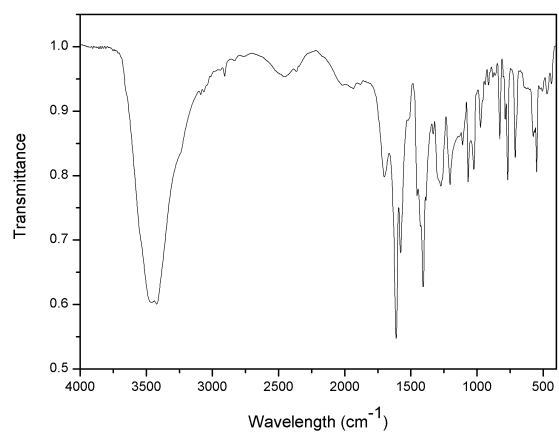

(c)

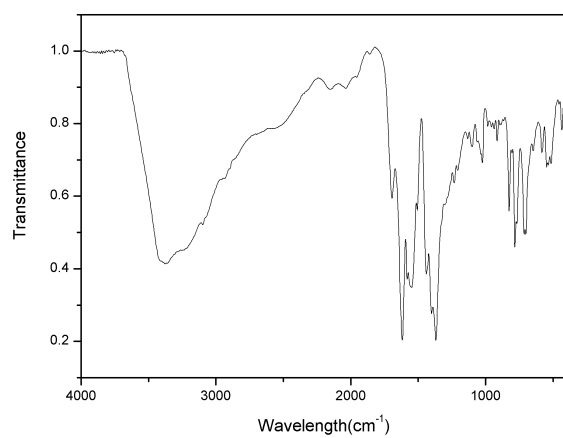

(d)

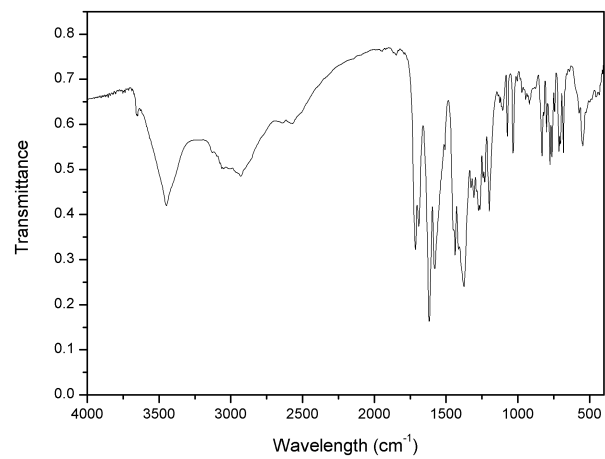

(e)

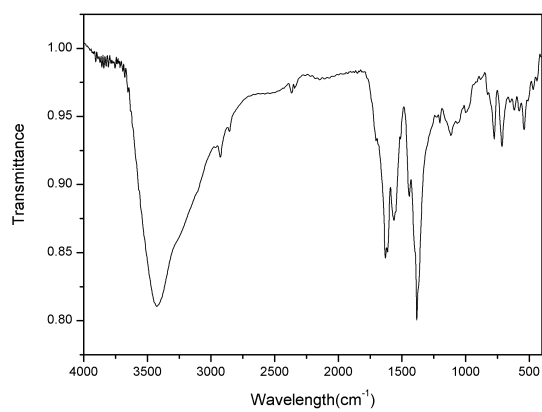

(f)

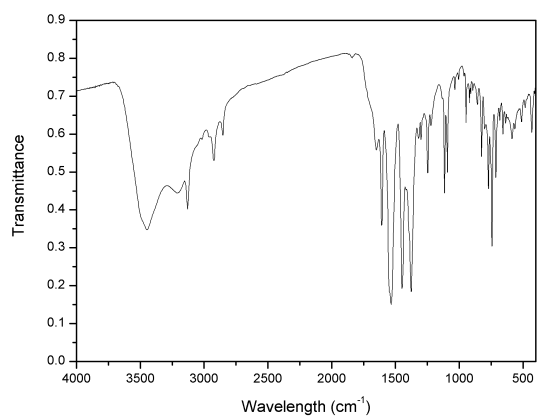

(g)

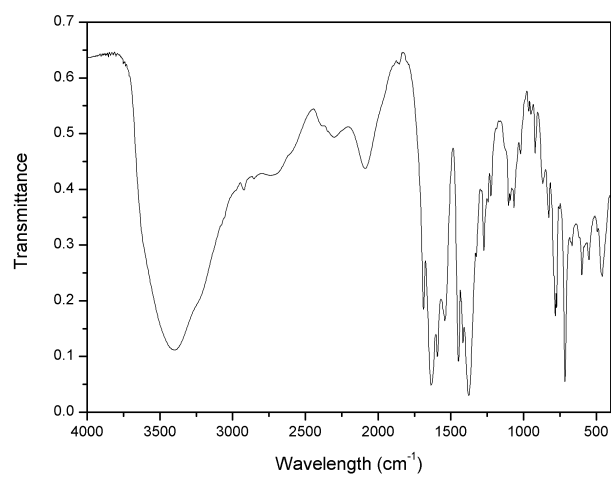

(h)

Figure S4 IR spectra of complexes **1-8** (a-h).

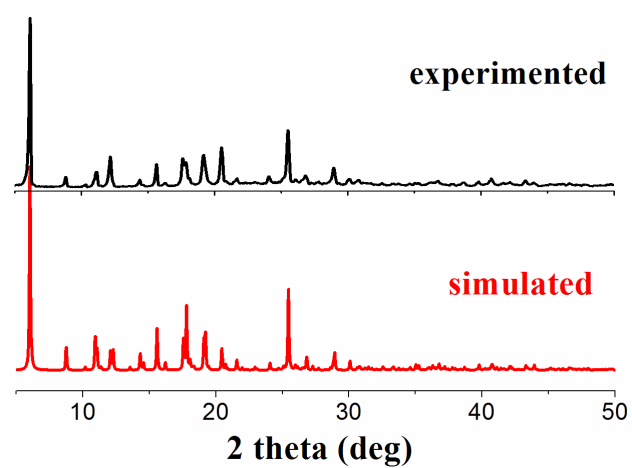

(a)

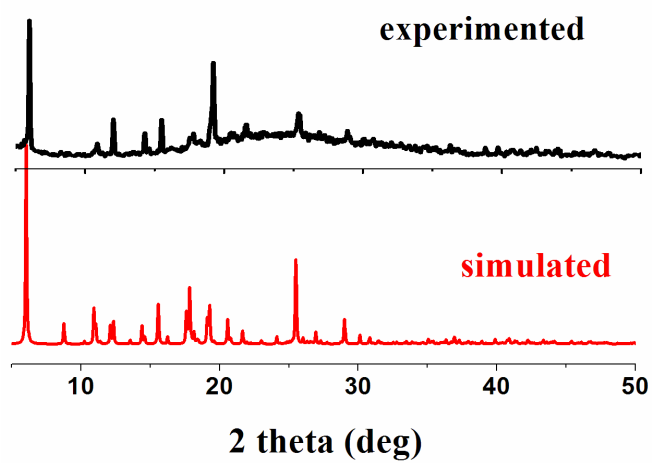

(b)

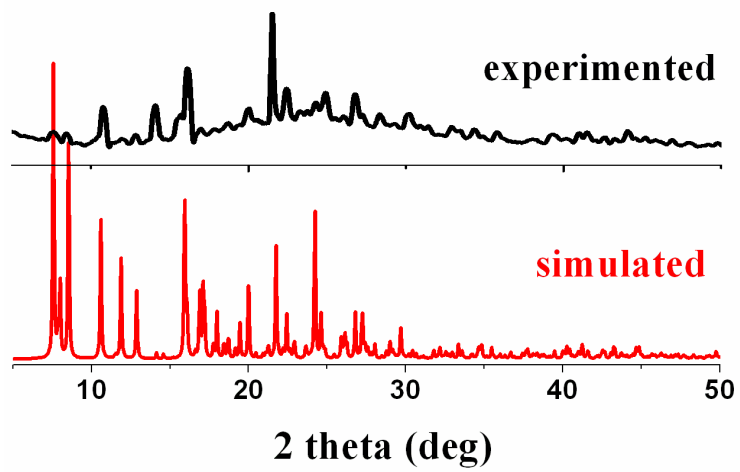

(c)

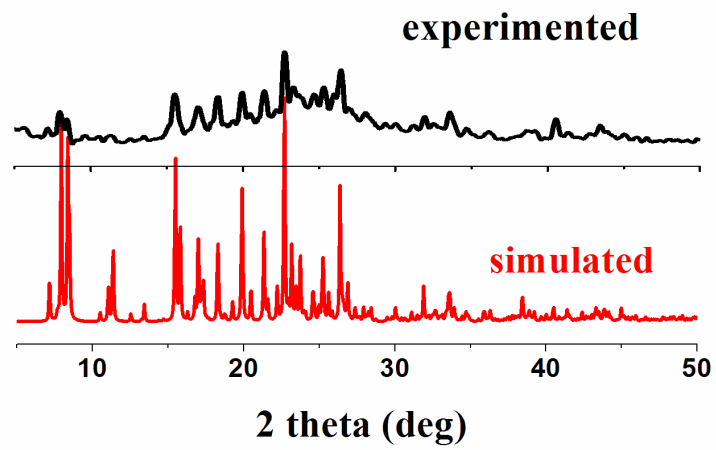

(d)

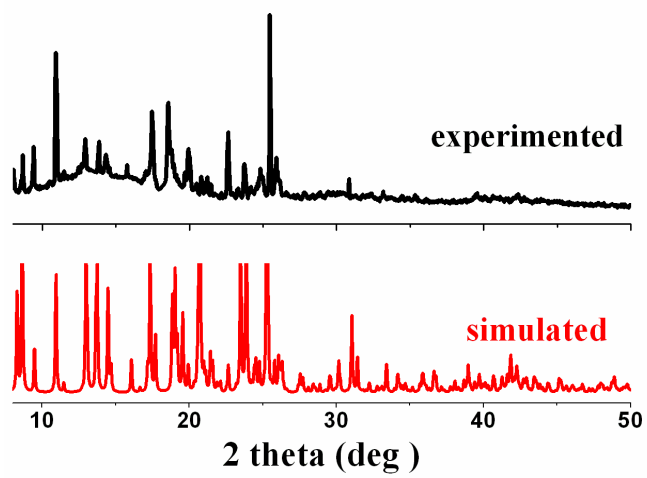

(e)

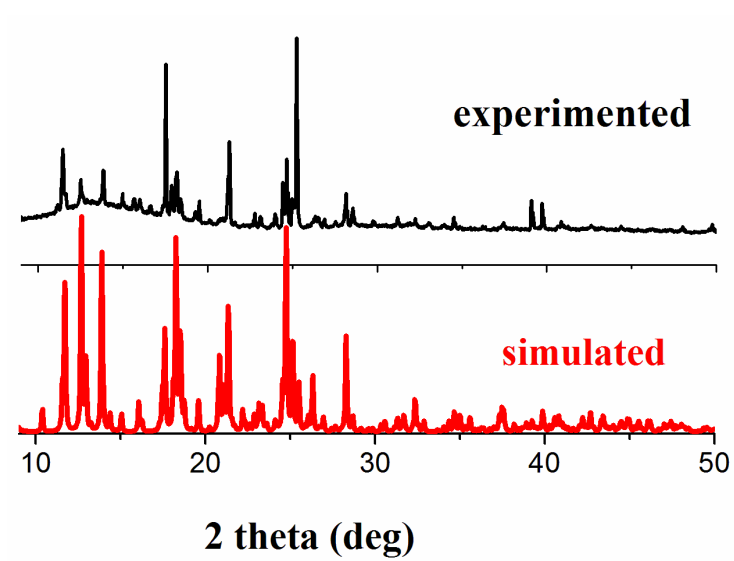

(f)

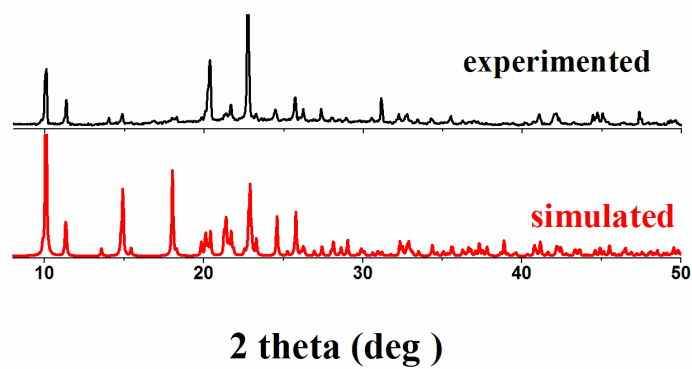

(g)

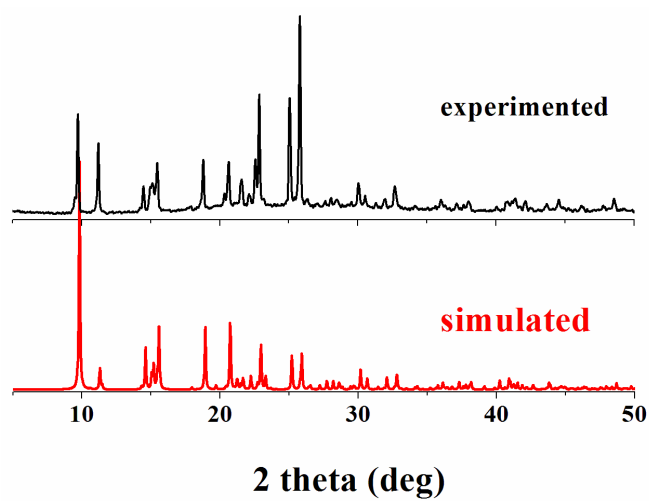

(h)

Figure S5 XRD spectra of complexes 1-8 (a-h).

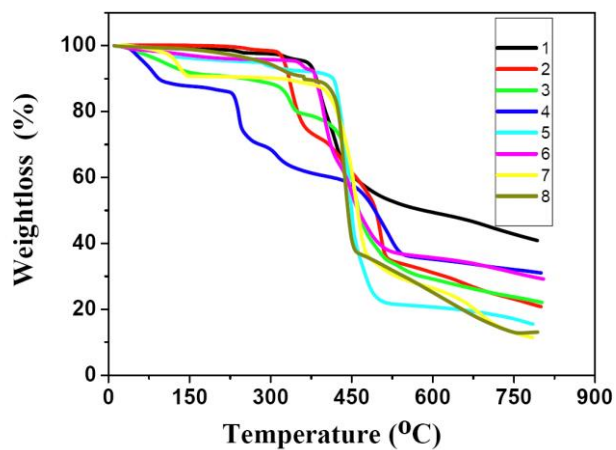

Figure S6 The TG curves of complexes **1-8**.

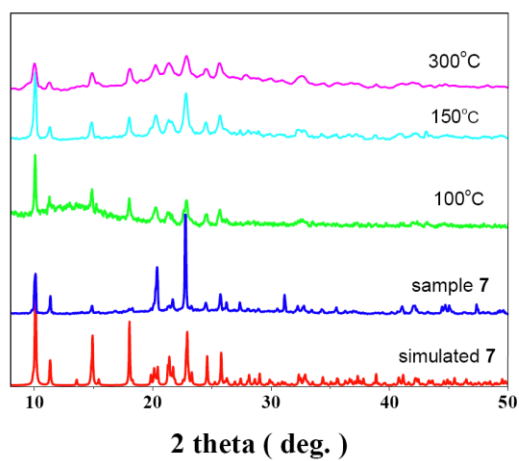

Figure S7 PXRD figures of complex **7** at 100, 150 and 300°C for two hours in air.

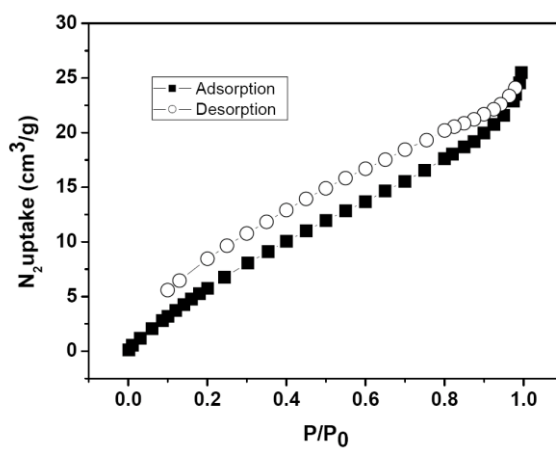

Figure S8 N<sub>2</sub> adsorption isotherms at 77K of complex **7**.
